# Supplementary material
Source: PubMed Central journal article supplement (PMC10353690)
Supplement: i1537-2073-25-4-167_s01.pdf [file i1537-2073-25-4-167_s01.pdf]

**Table S1.** Full Search Strategy

| Database                 | Search                                                                                                                                                                                                                                                                                                                                                                                                                                                                                                                                                                                                                                   |
|--------------------------|------------------------------------------------------------------------------------------------------------------------------------------------------------------------------------------------------------------------------------------------------------------------------------------------------------------------------------------------------------------------------------------------------------------------------------------------------------------------------------------------------------------------------------------------------------------------------------------------------------------------------------------|
| AMED, CINHAL (via EBSCO) | <p>S1 (MH "Multiple Sclerosis")<br/>           S2 "multiple sclerosis"<br/>           S3 "MS"<br/>           S4 "demyelinat*"<br/>           S5 S1 OR S2 OR S3 OR S4<br/>           S6 (MH "Dancing+")<br/>           S7 (MH "Dance Therapy")<br/>           S8 "danc*"<br/>           S9 "ballet"<br/>           S10 "ballroom"<br/>           S11 "tango"<br/>           S12 "jazz"<br/>           S13 "Zumba"<br/>           S14 "movement to music"<br/>           S15 S6 OR S7 OR S8 OR S9 OR S10 OR S11 OR S12<br/>           S16 S5 AND S15</p> <p>Expanders: Apply equivalent subjects</p> <p>→ AMED: 10</p> <p>→ CINHAL: 60</p> |
| Medline (via Ovid)       | <p>S1 Multiple Sclerosis/<br/>           S2 multiple sclerosis.mp.<br/>           S3 MS.mp.<br/>           S4 demyelinat*.mp.<br/>           S5 S1 OR S2 OR S3 OR S4<br/>           S6 exp Dancing/<br/>           S7 exp Dance Therapy/</p>                                                                                                                                                                                                                                                                                                                                                                                             |

|                                                                                        |                                                                                                                                                                                                                                                                                                                                                                                 |
|----------------------------------------------------------------------------------------|---------------------------------------------------------------------------------------------------------------------------------------------------------------------------------------------------------------------------------------------------------------------------------------------------------------------------------------------------------------------------------|
|                                                                                        | <p>S8 danc*.mp.<br/> S8 ballet.mp.<br/> S10 ballroom.mp.<br/> S11 tango.mp.<br/> S12 jazz.mp.<br/> S13 zumba.mp.<br/> S14 movement to music.mp.<br/> S15 S6 OR S7 OR S8 OR S9 OR S10 OR S11 OR S12<br/> S16 S5 AND S15</p> <p>→ 91</p>                                                                                                                                          |
| Web of Science (Core Collection)                                                       | <p>(TS=("multiple sclerosis" OR "MS" OR "demyelinat*")) AND<br/> TS=((danc* OR "ballet" OR "ballroom" OR "tango" OR "jazz"<br/> OR "Zumba" OR "movement to music" ) )</p> <p>→ 216</p>                                                                                                                                                                                          |
| ProQuest (Health & Medical Collection, Nursing & Allied Health Database, and PsycINFO) | <p>S1 (noft("multiple sclerosis") OR TI,AB("MS") OR<br/> noft("demyelinat*"))<br/> S2 (noft(danc*) OR noft("ballet") OR noft("ballroom") OR<br/> noft("tango") OR noft("jazz") OR noft("zumba") OR<br/> noft("movement to music"))<br/> S3 S1 AND S2</p> <p>→ Health &amp; Medical Collection: 173</p> <p>→ Nursing &amp; Allied Health Database: 84</p> <p>→ PsychINFO: 50</p> |
| Scopus                                                                                 | <p>( TITLE-ABS-KEY ( "multiple sclerosis" OR "demyelinat*" ) )<br/> AND ( TITLE-ABS-KEY ( danc* OR "ballet" OR "ballroom"</p>                                                                                                                                                                                                                                                   |

|  |                                                            |
|--|------------------------------------------------------------|
|  | OR "tango" OR "jazz" OR "zumba" OR "movement to music" ) ) |
|--|------------------------------------------------------------|

→ 50

**Table S2.** Complete Characteristics of Included Studies

| Author, Date, Design                                    | Sample Characteristics<br>(size <sup>a</sup> , sex, age, MS type, disability status, disease duration)                                                                                                                                                | Intervention Characteristics<br>(type, delivery mode, dosage, frequency, duration, adverse events, adherence, dropouts)                                                                                                                                                                                                                  | Outcome Measures                                                                                                                                                                                                   | Main Findings                                                                                                                                                                                                                                                                                                                                                                                                                                                                               | Quality                             |
|---------------------------------------------------------|-------------------------------------------------------------------------------------------------------------------------------------------------------------------------------------------------------------------------------------------------------|------------------------------------------------------------------------------------------------------------------------------------------------------------------------------------------------------------------------------------------------------------------------------------------------------------------------------------------|--------------------------------------------------------------------------------------------------------------------------------------------------------------------------------------------------------------------|---------------------------------------------------------------------------------------------------------------------------------------------------------------------------------------------------------------------------------------------------------------------------------------------------------------------------------------------------------------------------------------------------------------------------------------------------------------------------------------------|-------------------------------------|
| <b>Randomized Controlled Trial</b>                      |                                                                                                                                                                                                                                                       |                                                                                                                                                                                                                                                                                                                                          |                                                                                                                                                                                                                    |                                                                                                                                                                                                                                                                                                                                                                                                                                                                                             |                                     |
| Young et al, <sup>35</sup> 2019; proof-of-concept trial | <p>81 (self-reported diagnosis);</p> <p>66F/15M;</p> <p>Mean age dance group, 49.67 ± 9.40 years;</p> <p>MS type, NR;</p> <p>PDDS range, 0-6 (no disability - bilateral support);</p> <p>Mean disease duration of dance group, 13.56 ± 8.26 years</p> | <p><b>Movement-to-music</b> (M2M, n = 27);</p> <p>Group, in-person;</p> <p>60 minutes x 3/week for 12 weeks;</p> <p>AE (study-related), 1;</p> <p>Adherence, 53.7%</p> <p>Lost to follow-up, n = 3</p> <p>Adapted yoga (AY, n = 26);</p> <p>Group, in-person;</p> <p>60 minutes x 3/week for 12 weeks;</p> <p>AE (study-related), 0;</p> | <p>Primary:<br/>Mobility (TUG)</p> <p>Walking endurance (6MWT)</p> <p>Lower-extremity functional strength (5XSTS)</p> <p>Secondary:<br/>Fatigue and pain (PROMIS Fatigue and Pain Interference Short Forms 8a)</p> | <p>Primary:<br/><u>TUG</u><br/>Pre M2M group: 12.3 ± 12.4<br/>Post M2M group: 12.2 ± 14.1<br/>Group difference (<i>P</i> = .03)*</p> <p>Post hoc, between M2M-WC (<i>P</i> = .01)*<br/>Cohen's <i>d</i> = 0.7, medium ES</p> <p>Post hoc, between AY-WC (<i>P</i> = .09)<sup>o</sup></p> <p><u>6MWT</u><br/>Pre M2M group: 341.7 ± 110.1<br/>Post M2M group: 383.9 ± 134.1<br/>Group difference accounting for PDDS (<i>P</i> = .04)*</p> <p>Post hoc, between M2M-WC (<i>P</i> = .04)*</p> | Moderate (60% quality criteria met) |

|  |  |                                                                                                                                                                         |  |                                                                                                                                                                                                                                                                                                                                                                                                                                                              |  |
|--|--|-------------------------------------------------------------------------------------------------------------------------------------------------------------------------|--|--------------------------------------------------------------------------------------------------------------------------------------------------------------------------------------------------------------------------------------------------------------------------------------------------------------------------------------------------------------------------------------------------------------------------------------------------------------|--|
|  |  | <p>Adherence, 67.7%</p> <p>Lost to follow-up, n = 5</p> <p>Waitlist control (WC, n = 28);</p> <p>Biweekly, educational newsletters;</p> <p>Lost to follow-up, n = 5</p> |  | <p>Cohen's <math>d = 0.6</math>, medium ES</p> <p>Post-hoc, between AY-WC (<math>P = .25</math>)</p> <p><u>5XSTS</u><br/>Group difference (<math>P = .41</math>)</p> <p>Secondary:<br/><u>PROMIS-Fatigue</u><br/>Group difference accounting for PDDS (<math>P = .08</math>)°</p> <p>Post hoc, between M2M-WC (<math>P = .09</math>)°<br/>Cohen's <math>d = 0.49</math>, medium ES</p> <p><u>PROMIS-Pain</u><br/>Group difference (<math>P = .70</math>)</p> |  |
|--|--|-------------------------------------------------------------------------------------------------------------------------------------------------------------------------|--|--------------------------------------------------------------------------------------------------------------------------------------------------------------------------------------------------------------------------------------------------------------------------------------------------------------------------------------------------------------------------------------------------------------------------------------------------------------|--|

### Nonrandomized Studies

|                                                                                  |                                                                                                                                                               |                                                                                                                                                    |                                                                                                                                           |                                                                                                                                                                                                                                                                                                                        |                                            |
|----------------------------------------------------------------------------------|---------------------------------------------------------------------------------------------------------------------------------------------------------------|----------------------------------------------------------------------------------------------------------------------------------------------------|-------------------------------------------------------------------------------------------------------------------------------------------|------------------------------------------------------------------------------------------------------------------------------------------------------------------------------------------------------------------------------------------------------------------------------------------------------------------------|--------------------------------------------|
| <p>Mandelbaum et al,<sup>38</sup> 2016; uncontrolled, before-and-after study</p> | <p>8 (confirmed diagnosis);</p> <p>5F/3M;</p> <p>Age range, 29-63 years;</p> <p>7 RRMS/1 SPMS;</p> <p>PDDS range, 0-3 (no disability-walking disability);</p> | <p><b>Salsa dance;</b></p> <p>Group, in-person;</p> <p>60 minutes x 2/week for 4 weeks;</p> <p>AE, 0;</p> <p>Adherence, 98%</p> <p>Dropouts, 0</p> | <p>Gait (T25-FW, MSWS-12)</p> <p>Balance (DGI, BBS)</p> <p>Mobility (TUG)</p> <p>Balance confidence (ABC)</p> <p>Self-efficacy (MSSS)</p> | <p><i>Pre-post, within group</i><br/><u>TUG</u> (<math>P = .02</math>)*<br/>Pre: 9.5 (8.6; 10.0)<br/>Post: 8.5 (8.1; 8.9)</p> <p><u>GLTEQ</u> (<math>P = .01</math>)*<br/>Total minutes/week<br/>Pre: 250.0 (25.0; 447.5)<br/>Post: 450.0 (305.0; 731.3)</p> <p>Moderate exercise (min)<br/>Pre: 70.0 (0.0; 338.8)</p> | <p>Moderate (60% quality criteria met)</p> |
|----------------------------------------------------------------------------------|---------------------------------------------------------------------------------------------------------------------------------------------------------------|----------------------------------------------------------------------------------------------------------------------------------------------------|-------------------------------------------------------------------------------------------------------------------------------------------|------------------------------------------------------------------------------------------------------------------------------------------------------------------------------------------------------------------------------------------------------------------------------------------------------------------------|--------------------------------------------|

|  |                                    |  |                                                                                                                                                    |                                                                                                                                                                                                                                                                                                                                                                                                                                                                                                                                                                                                                                                                                                                                                                                                                                |  |
|--|------------------------------------|--|----------------------------------------------------------------------------------------------------------------------------------------------------|--------------------------------------------------------------------------------------------------------------------------------------------------------------------------------------------------------------------------------------------------------------------------------------------------------------------------------------------------------------------------------------------------------------------------------------------------------------------------------------------------------------------------------------------------------------------------------------------------------------------------------------------------------------------------------------------------------------------------------------------------------------------------------------------------------------------------------|--|
|  | Disease duration range, 1-22 years |  | <p>Motivation for PA (MPAM-R)</p> <p>Physical activity (GLTEQ)</p> <p>MS symptom checklist (MS Symptoms)</p> <p>Neurological disability (PDDS)</p> | <p>Post: 325.0 (240.0; 492.5)</p> <p>Total leisure activity (METs)<br/>Pre: 28.0 (4.5; 50.8)<br/>Post: 43.0 (30.0; 67.5)</p> <p><u>MS Symptoms</u> (<math>P = .05</math>)*<br/>Pre: 5.0 (2.0; 6.8)<br/>Post: 5.5 (2.3; 8.5)</p> <p><u>DGI</u> (<math>P = .09</math>)°</p> <p><u>ABC</u> (<math>P = .09</math>)°</p> <p><u>T25-FW</u>, <u>MSWS-12</u>, <u>BBS</u>, <u>MSSS</u>, <u>PDDS</u>, <u>MPAM-R</u>, (<math>P &gt; 0.1</math>)</p> <p><i>Pre 3-month follow-up</i><br/><u>DGI</u> (<math>P = .04</math>)*<br/>Pre: 22.5 (20.3; 23.8)<br/>3-month: 24.0 (22.3; 24.0)</p> <p><u>TUG</u> (<math>P = .05</math>)*<br/>Pre: 9.5 (8.6; 10.0)<br/>3-month: 8.3 (8.0; 8.9)</p> <p><u>MSWS-12</u> (<math>P = .05</math>)*<br/>Pre: 29.2 (1.0; 59.9)<br/>3-month: 17.7 (1.6; 41.7)</p> <p><u>GLTEQ</u> (<math>P = .07</math>)°</p> |  |
|--|------------------------------------|--|----------------------------------------------------------------------------------------------------------------------------------------------------|--------------------------------------------------------------------------------------------------------------------------------------------------------------------------------------------------------------------------------------------------------------------------------------------------------------------------------------------------------------------------------------------------------------------------------------------------------------------------------------------------------------------------------------------------------------------------------------------------------------------------------------------------------------------------------------------------------------------------------------------------------------------------------------------------------------------------------|--|

|                                                                                 |                                                                                                                                                                              |                                                                                                                                                                             |                                                                                                                                                                                                                 |                                                                                                                                                                                                                                                                                                                                                                                                                                                                                                                                                                                                                                                                                                                                                                                                   |                                                 |
|---------------------------------------------------------------------------------|------------------------------------------------------------------------------------------------------------------------------------------------------------------------------|-----------------------------------------------------------------------------------------------------------------------------------------------------------------------------|-----------------------------------------------------------------------------------------------------------------------------------------------------------------------------------------------------------------|---------------------------------------------------------------------------------------------------------------------------------------------------------------------------------------------------------------------------------------------------------------------------------------------------------------------------------------------------------------------------------------------------------------------------------------------------------------------------------------------------------------------------------------------------------------------------------------------------------------------------------------------------------------------------------------------------------------------------------------------------------------------------------------------------|-------------------------------------------------|
|                                                                                 |                                                                                                                                                                              |                                                                                                                                                                             |                                                                                                                                                                                                                 | <p><u>T25-FW, ABC, BBS, MSSS, MS Symptoms, MPAM-R, PDDS</u> (<math>P &gt; .1</math>)</p> <p><i>Pre 6-month follow-up</i><br/>All outcomes (<math>P &gt; .1</math>)</p>                                                                                                                                                                                                                                                                                                                                                                                                                                                                                                                                                                                                                            |                                                 |
| <p>Scheidler et al,<sup>39</sup> 2018; uncontrolled, before-and-after study</p> | <p>8 (confirmed diagnosis);<br/>8F/0M;<br/>Age range, 36-65 years;<br/>All RRMS;<br/>EDSS range, 2.5-6.5 (mild disability-moderate disability);<br/>Disease duration, NR</p> | <p><b>Targeted ballet;</b><br/>Group, in-person;<br/>60 minutes x 2/week for 16 weeks;<br/>AE, 0;<br/>Adherence, preset criteria of over 94% of classes<br/>Dropouts, 2</p> | <p>Ataxia (ICARS and smoothness of movement in 5-meter walk from motion capture data [Uni-Lateral S-index])</p> <p>Balance (MBT and center of pressure measurements of balance in step-to-stand task [GBM])</p> | <p><i>Pre-post, within group</i><br/><u>ICARS</u><br/>Pre: <math>19.6 \pm 6.3</math><br/>Post: <math>8.19 \pm 6.6</math><br/>(<math>P &lt; .001</math>)*<br/>Cohen's <math>d = 2.6</math>, huge ES</p> <p><u>Unilateral S-index, right</u><br/>Pre: <math>-81.7 \pm 10.9</math><br/>Post: <math>-75 \pm 8.7</math><br/>(<math>P = .028</math>)*<br/>Cohen's <math>d = 0.87</math>, large ES</p> <p><u>Unilateral S-index, left</u><br/>Pre: <math>-78.6 \pm 10.3</math><br/>Post: <math>-73.2 \pm 7.5</math><br/>(<math>P = .027</math>)*<br/>Cohen's <math>d = 0.87</math>, large ES</p> <p><u>MBT</u><br/>Pre: <math>16.6 \pm 5.0</math><br/>Post: <math>23.6 \pm 2.6</math><br/>(<math>P = .001</math>)*<br/>Cohen's <math>d = 1.2</math>, very large ES</p> <p><u>GBM, back direction</u></p> | <p>Moderate-high (80% quality criteria met)</p> |

|                                                                  |                                                                                                                                                                            |                                                                                                                                                                                                                                          |                                                                                                                                                                                                                                                               |                                                                                                                                                                                                                                                                                                                                                                                                                                                                                                                                                                                                                                                          |                                          |
|------------------------------------------------------------------|----------------------------------------------------------------------------------------------------------------------------------------------------------------------------|------------------------------------------------------------------------------------------------------------------------------------------------------------------------------------------------------------------------------------------|---------------------------------------------------------------------------------------------------------------------------------------------------------------------------------------------------------------------------------------------------------------|----------------------------------------------------------------------------------------------------------------------------------------------------------------------------------------------------------------------------------------------------------------------------------------------------------------------------------------------------------------------------------------------------------------------------------------------------------------------------------------------------------------------------------------------------------------------------------------------------------------------------------------------------------|------------------------------------------|
|                                                                  |                                                                                                                                                                            |                                                                                                                                                                                                                                          |                                                                                                                                                                                                                                                               | <p>Pre: <math>-4.82 \pm 6.9</math><br/> Post: <math>-17 \pm 10.4</math><br/> (<math>P = .025</math>)*<br/> Cohen's <math>d = .68</math>, medium ES</p> <p><u>GBM, right, left, and front</u><br/> (<math>P &gt; .05</math>)</p>                                                                                                                                                                                                                                                                                                                                                                                                                          |                                          |
| Ng et al, <sup>37</sup> 2020; controlled, before-and-after study | <p>13 (confirmed diagnosis);<br/> 12F/1M;<br/> Age range, 40-59 years;<br/> 12 RRMS/1 PPMS;<br/> PDDS range, 1-4 (mild disability-cane use);<br/> Disease duration, NR</p> | <p><b>Ballroom dance</b> (n = 7);<br/> Group, in-person;<br/> 60 minutes x 2/week for 6 weeks;<br/> AE, 0;<br/> Adherence, all complete at least 75% sessions (preset criteria)<br/> Dropouts, 0<br/> No-dance control group (n = 6)</p> | <p>HR-QoL (PROMIS-GH)<br/> Self-efficacy (MSSE)<br/> MS Exercise Self-efficacy<br/> Fatigue (FIS)<br/> Depression (BDI)<br/> Balance (BBS, DGI)<br/> Mobility (TUG)<br/> Physical function (MSFC: 9-HPT, T25-FW, PASAT)<br/> Exercise intensity (HR, RPE)</p> | <p><i>Within group, dance group:</i><br/> <u>PROMIS-GH</u> (<math>P = .03</math>)*<br/> Pre: 40 (29,45)<br/> Post: 42 (34,48)</p> <p><u>MSFC</u> (<math>P = .03</math>)*<br/> Pre: 0.25 (-1.33, 0.35)<br/> Post: 0.47 (-0.90, 0.55)</p> <p><u>PASAT</u> (<math>P = .03</math>)*<br/> Pre: 49 (31, 55)<br/> Post: 55 (45, 60)</p> <p><u>FIS</u> (<math>P = .07</math>)°<br/> <u>BDI</u> (<math>P = .07</math>)°<br/> <u>BBS</u> (<math>P = .07</math>)°<br/> <u>TUG</u> (<math>P = .08</math>)°<br/> <u>MSSE-Control</u> (<math>P = .46</math>),<br/> <u>MSSE-Function</u> (<math>P = .18</math>), <u>MS Exercise Self-efficacy</u> (<math>P =</math></p> | Moderate-high (80% quality criteria met) |



|                                                                                     |                                                                                                                                                                                                       |                                                                                                                                                                    |                                                                                                                                                                                                                  |                                                                                                                                                                                                                                                                                                                                                                                                                          |                                            |
|-------------------------------------------------------------------------------------|-------------------------------------------------------------------------------------------------------------------------------------------------------------------------------------------------------|--------------------------------------------------------------------------------------------------------------------------------------------------------------------|------------------------------------------------------------------------------------------------------------------------------------------------------------------------------------------------------------------|--------------------------------------------------------------------------------------------------------------------------------------------------------------------------------------------------------------------------------------------------------------------------------------------------------------------------------------------------------------------------------------------------------------------------|--------------------------------------------|
|                                                                                     |                                                                                                                                                                                                       |                                                                                                                                                                    |                                                                                                                                                                                                                  | <p>.21), <u>DGI</u> (<math>P = .11</math>), <u>9HPT</u> (<math>P = .35</math>), <u>T25-FW</u> (<math>P = .53</math>)</p> <p><i>Within group, control group:</i><br/>All outcomes (<math>P &gt; .1</math>)</p> <p><i>Between dance &amp; control groups:</i><br/><u>PROMIS-GH</u><br/>(<math>P \leq .05</math>)*</p> <p><u>MSFC</u><br/>(<math>P \leq .05</math>)*</p> <p><u>PASAT</u><br/>(<math>P \leq .05</math>)*</p> |                                            |
| <p>Van Geel et al,<sup>36</sup> 2020; controlled, pilot, before-and-after study</p> | <p>17 (confirmed diagnosis);<br/>16F/1M;<br/>Age range, 29-65 years;<br/>MS Type, NR;<br/>Disability status, cane (n = 1), walker (n = 2), crutch (n = 1);<br/>Disease duration range, 3-21 years</p> | <p><b>Choreo-based participatory dance</b> (n = 7);<br/>Group, in-person;<br/>90 minutes x 2/week for 10 weeks;<br/>AE, NR;<br/>Adherence, NR;<br/>Dropouts, 1</p> | <p>Primary:<br/>Fatigue (MFIS, FSS, DWI, CFI)</p> <p>Secondary:<br/>Physical capacity (6MWT, T25-FW, ABC, DGI, 5TSTS, MSWS-12, 9HPT)</p> <p>Sensory function (EmNSA)</p> <p>Cognitive capacity (SMDT, PASAT)</p> | <p><i>Within group, dance group:</i><br/>Primary:<br/><u>MFIS</u> (<math>P = .03</math>)*<br/>Pre: 43 (19; 48)<br/>Post: 26 (6; 49)</p> <p><u>MFIS physical</u> (<math>P = .02</math>)*<br/>Pre: 19 (8; 24)<br/>Post: 13 (3; 20)</p> <p><u>FSS</u> (<math>P = .31</math>), <u>DWI</u> (<math>P = .87</math>), <u>CFI</u> (<math>P = .25</math>)</p> <p>Secondary:<br/><u>5STS</u> (<math>P = .04</math>)*</p>            | <p>Moderate (60% quality criteria met)</p> |

|  |  |                                                                                                                                                        |                                                                                     |                                                                                                                                                                                                                                                                                                                                                                                                                                                                                                                                                                                                                                                                                                                                                                                                                                                                                         |  |
|--|--|--------------------------------------------------------------------------------------------------------------------------------------------------------|-------------------------------------------------------------------------------------|-----------------------------------------------------------------------------------------------------------------------------------------------------------------------------------------------------------------------------------------------------------------------------------------------------------------------------------------------------------------------------------------------------------------------------------------------------------------------------------------------------------------------------------------------------------------------------------------------------------------------------------------------------------------------------------------------------------------------------------------------------------------------------------------------------------------------------------------------------------------------------------------|--|
|  |  | <p>Control art group (n = 10);</p> <p>Group, in-person;</p> <p>Approximately 90 minutes x 2/week for 10 weeks;</p> <p>AE, NR;</p> <p>Adherence, NR</p> | <p>Dual Task Performance</p> <p>HR-QoL (MSIS-29, SF-36)</p> <p>Leg coordination</p> | <p><u>ABC</u> (<math>P = .04</math>)*</p> <p><u>MSWS-12</u> (<math>P = .046</math>)*</p> <p><u>9HPT-dominant</u> (<math>P = .02</math>)*</p> <p><u>DT - Cognitive</u> (<math>P = .03</math>)*</p> <p><u>Leg coordination</u> (<math>P = .046</math>)*</p> <p><u>PASAT</u> (<math>P = .068</math>)°</p> <p><u>MSIS-29</u> (<math>P = .063</math>)°</p> <p><u>DT Cost</u> (<math>P = .063</math>)°</p> <p><i>Within group, art group:</i></p> <p>Primary:</p> <p><u>MFIS</u> (<math>P = .005</math>)*<br/>Pre: 48 (41; 54)<br/>Post: 42 (28; 47)</p> <p><u>MFIS, physical</u> (<math>P = .01</math>)*<br/>Pre: 25 (20; 30)<br/>Post: 20 (13; 23)</p> <p><u>FSS</u> (<math>P = .72</math>), <u>DWI</u> (<math>P = .74</math>),<br/><u>CFI</u> (<math>P = .45</math>)</p> <p>Secondary:</p> <p><u>SDMT</u> (<math>P = .04</math>)*</p> <p><u>DT - Cognitive</u> (<math>P = .02</math>)*</p> |  |
|--|--|--------------------------------------------------------------------------------------------------------------------------------------------------------|-------------------------------------------------------------------------------------|-----------------------------------------------------------------------------------------------------------------------------------------------------------------------------------------------------------------------------------------------------------------------------------------------------------------------------------------------------------------------------------------------------------------------------------------------------------------------------------------------------------------------------------------------------------------------------------------------------------------------------------------------------------------------------------------------------------------------------------------------------------------------------------------------------------------------------------------------------------------------------------------|--|

|                                                                                     |                                                                                                                                                                                         |                                                                                                                                                                                                                   |                                                                                                                                            |                                                                                                                                                                                                                                                                   |                                              |
|-------------------------------------------------------------------------------------|-----------------------------------------------------------------------------------------------------------------------------------------------------------------------------------------|-------------------------------------------------------------------------------------------------------------------------------------------------------------------------------------------------------------------|--------------------------------------------------------------------------------------------------------------------------------------------|-------------------------------------------------------------------------------------------------------------------------------------------------------------------------------------------------------------------------------------------------------------------|----------------------------------------------|
|                                                                                     |                                                                                                                                                                                         |                                                                                                                                                                                                                   |                                                                                                                                            | <u>PASAT</u> ( $P = .085$ )°                                                                                                                                                                                                                                      |                                              |
| Camacho et al, <sup>40</sup><br>2021;<br>uncontrolled,<br>before-and-after<br>study | 5 (confirmed diagnosis);<br><br>4F/1M;<br><br>Age range, 38-64 years;<br><br>All RRMS;<br><br>EDSS, mean of $3.5 \pm 1.5$<br>(mild-moderate<br>disability);<br><br>Disease duration, NR | <b>Targeted ballet;</b><br><br>Group, in-person;<br><br>60 minutes x 2/week for<br>12 weeks;<br><br>AE, 0;<br><br>Adherence, mean hours<br>of $21.8 \pm 4.65$ (preset<br>criteria of 24 hours)<br><br>Dropouts, 0 | Ataxia (ICARS and<br>smoothness of<br>movement in 5-meter<br>walk from motion<br>capture data [Bilateral<br>S-index])<br><br>Balance (MBT) | <i>Pre-post, within group:</i><br><br><u>ICARS</u><br>( $P = .01$ )*<br>Hedge's $g = -1.21$ , large ES<br><br><u>MBT</u><br>( $P = .015$ )*<br>Hedge's $g = 1.08$ , large ES<br><br><u>Bilateral S-index</u><br>( $P = .0499$ )*<br>Hedge's $g = .69$ , medium ES | Moderate<br>(60%<br>quality<br>criteria met) |
| <b>Quantitative Descriptive Studies</b>                                             |                                                                                                                                                                                         |                                                                                                                                                                                                                   |                                                                                                                                            |                                                                                                                                                                                                                                                                   |                                              |
| Salgado and de<br>Paula<br>Vasconcelos, <sup>43</sup><br>2010;<br>case report       | 1 (confirmed diagnosis);<br><br>Female;<br><br>Age, 45 years;<br><br>RRMS;<br><br>EDSS, 3 (moderate<br>disability);<br><br>Disease duration, 10 years                                   | <b>Dance/movement<br/>therapy;</b><br><br>1 on 1, in-person;<br><br>100 minutes x 2/ week<br>for 20 weeks;<br><br>AE, NR;<br><br>Adherence and<br>dropouts, N/A                                                   | Neurological disability<br>(EDSS, MRD, NRS)                                                                                                | <i>Pre-post changes</i><br><br><u>EDSS</u><br>Pre: 3<br>Post: 2 (-1)<br><br><u>MRD</u><br>Pre: 6<br>Post: 5 (-1)<br><br><u>NRS</u><br>Pre: 64<br>Post: 71 (+7)                                                                                                    | Low (40%<br>quality<br>criteria met)         |

|                                                                                          |                                                                                                                                                                                                                                       |                                                                                                                                                                                  |                                                                                                                                                                     |                                                                                                                                                                                                                                                                                                                      |                                                        |
|------------------------------------------------------------------------------------------|---------------------------------------------------------------------------------------------------------------------------------------------------------------------------------------------------------------------------------------|----------------------------------------------------------------------------------------------------------------------------------------------------------------------------------|---------------------------------------------------------------------------------------------------------------------------------------------------------------------|----------------------------------------------------------------------------------------------------------------------------------------------------------------------------------------------------------------------------------------------------------------------------------------------------------------------|--------------------------------------------------------|
| <p>Charlton et al,<sup>42</sup><br/>2010;<br/>evaluation</p>                             | <p>11 (confirmed diagnosis);<br/>11F/0M;<br/><br/>Age range, 32-70 years;<br/><br/>MS type, NR;<br/><br/>Disability status,<br/>ambulatory without<br/>assistance (n = 7), use<br/>walkers (n = 4);<br/><br/>Disease duration, NR</p> | <p><b>Jazzercise;</b><br/><br/>Group, in-person;<br/><br/>45 minutes x 2/ week for<br/>16 weeks;<br/><br/>AE, 0;<br/><br/>Adherence, 67-75%<br/><br/>Dropouts, n = 3</p>         | <p>Questionnaire<br/>evaluating participant-<br/>reported changes in<br/>balance, confidence,<br/>coordination, energy,<br/>flexibility, mood, and<br/>strength</p> | <p>Percentage agreed or strongly<br/>agreed outcome improved<br/>postintervention:<br/><br/>56% balance and coordination<br/>67% strength and flexibility<br/>78% confidence<br/>100% energy &amp; mood<br/>100% enjoyment &amp;<br/>satisfaction with classes &amp;<br/>motivation to continue with<br/>classes</p> | <p>Low (40%<br/>quality<br/>criteria met)</p>          |
| <p>Lachance et al,<sup>41</sup><br/>2021;<br/>single-case<br/>experimental<br/>study</p> | <p>1 (confirmed diagnosis);<br/>+6 other people with<br/>reduced mobility<br/><br/>Female;<br/><br/>Age, 60 years;<br/><br/>MS Type, NR;<br/><br/>Disability status, walks<br/>with a limp;<br/><br/>Disease duration, NR</p>         | <p><b>Clinical dance therapy;</b><br/><br/>Group, in-person;<br/><br/>90 minutes x 2/ week for<br/>12 weeks;<br/><br/>AE, NR;<br/><br/>Adherence, 71%<br/><br/>Dropouts, N/A</p> | <p>Primary:<br/>Mobility (FSST)<br/><br/>Secondary:<br/>Mobility (MDRT-<br/>behind, MBT)</p>                                                                        | <p>Tau-U analysis<br/>Primary:<br/><u>FSST</u><br/>(<i>P</i> = .86)<br/>Tau-U: 0.08<br/><br/>Secondary:<br/><u>MDRT-behind</u><br/>(<i>P</i> = .034)*<br/>Tau-U: -1, Very large ES<br/><br/><u>MBT</u><br/>(<i>P</i> = .034)*<br/>Tau-U: 1, Very large ES</p>                                                        | <p>Moderate<br/>(60%<br/>quality<br/>criteria met)</p> |

|                                                           |                                                                                                                                            |                                                                                                                                                                                |                                                                                                                                                                                                        |                                                                                                                                                                                                                                                                                                                                                                                                                                                                                                                                                                                                                                                                                                                                                                                    |                                       |
|-----------------------------------------------------------|--------------------------------------------------------------------------------------------------------------------------------------------|--------------------------------------------------------------------------------------------------------------------------------------------------------------------------------|--------------------------------------------------------------------------------------------------------------------------------------------------------------------------------------------------------|------------------------------------------------------------------------------------------------------------------------------------------------------------------------------------------------------------------------------------------------------------------------------------------------------------------------------------------------------------------------------------------------------------------------------------------------------------------------------------------------------------------------------------------------------------------------------------------------------------------------------------------------------------------------------------------------------------------------------------------------------------------------------------|---------------------------------------|
| <p>Ares-Benítez et al,<sup>44</sup> 2021; case report</p> | <p>1 (confirmed diagnosis);<br/>Female;<br/>Age, 49 years;<br/>RRMS;<br/>EDSS, 5 (moderate disability);<br/>Disease duration, 24 years</p> | <p><b>Spanish dance &amp; physiotherapy;</b><br/><br/>1 on 1, in-person;<br/><br/>60 minutes x 5/week for 3 weeks;<br/><br/>AE, NR;<br/><br/>Adherence &amp; dropouts, N/A</p> | <p>Spasticity (MAS)<br/><br/>Balance (BBS)<br/><br/>Walking endurance (6MWT)<br/><br/>Spatiotemporal gait patterns (Gaitrite)<br/><br/>Muscle strength (MMT)<br/><br/>Range of motion (goniometry)</p> | <p><i>Pre-post changes</i><br/><u>BBS</u><br/>Pre: 30<br/>Post: 55 (+25 points)<br/><br/><u>6MWT</u><br/>Pre: 427.24 m and 1.19 m/s<br/>Post: 465 m and 1.46 m/s (+37.76 m and +0.27 m/s)<br/><br/><u>MMT</u><br/>Ankle dorsiflexors, +2 points<br/>Ankle plantar flexors, +1 point<br/>Knee and hip muscles, no change<br/><br/><u>MAS</u><br/>Sural triceps, -1 point<br/>Quadriceps, hamstrings, psoas &amp; adductors, no change<br/><br/><u>Spatiotemporal gait parameters, left lower limb, right lower limb</u><br/>Stride time (s), -0.04, -0.02<br/>Step length (cm), +12.6, +13.6<br/>Stride length (cm), +26.4, +26.1<br/>Base of support (cm), +3.9, +2.8<br/>Single support (%GC), +5.2, +3.3<br/>Double support (%GC), -10.2, -9.8<br/>Balance (%GC), +3.3, +5.4</p> | <p>Low (40% quality criteria met)</p> |
|-----------------------------------------------------------|--------------------------------------------------------------------------------------------------------------------------------------------|--------------------------------------------------------------------------------------------------------------------------------------------------------------------------------|--------------------------------------------------------------------------------------------------------------------------------------------------------------------------------------------------------|------------------------------------------------------------------------------------------------------------------------------------------------------------------------------------------------------------------------------------------------------------------------------------------------------------------------------------------------------------------------------------------------------------------------------------------------------------------------------------------------------------------------------------------------------------------------------------------------------------------------------------------------------------------------------------------------------------------------------------------------------------------------------------|---------------------------------------|

|                                                             |                                                                                                                                                                                                                                                   |                                                                                                                                                                      |                                                                                                                                                                    |                                                                                                                                                                                                                                                                                                                                    |                                              |
|-------------------------------------------------------------|---------------------------------------------------------------------------------------------------------------------------------------------------------------------------------------------------------------------------------------------------|----------------------------------------------------------------------------------------------------------------------------------------------------------------------|--------------------------------------------------------------------------------------------------------------------------------------------------------------------|------------------------------------------------------------------------------------------------------------------------------------------------------------------------------------------------------------------------------------------------------------------------------------------------------------------------------------|----------------------------------------------|
|                                                             |                                                                                                                                                                                                                                                   |                                                                                                                                                                      |                                                                                                                                                                    | Speed (cm/s), +24.8<br>Cadence (steps/minute), +4.6                                                                                                                                                                                                                                                                                |                                              |
| <b>Mixed Methods Studies</b>                                |                                                                                                                                                                                                                                                   |                                                                                                                                                                      |                                                                                                                                                                    |                                                                                                                                                                                                                                                                                                                                    |                                              |
| Mason, <sup>45</sup> 2020;<br>thesis                        | 5 (self-reported<br>diagnosis);<br><br>Sex, age, MS type,<br>disability status, and<br>disease duration, NR                                                                                                                                       | <b>Participatory dance;</b><br><br>Group, in-person;<br><br>75 minutes x 1/week for<br>6 weeks;<br><br>AE, NR;<br><br>Adherence, 93%<br><br>Dropouts, n = 0          | <i>Quantitative</i><br>Self-efficacy (MSSE-<br>10)<br><br><i>Qualitative</i><br>Exit questionnaire                                                                 | <i>Quantitative</i><br>Pre-post, within group<br><u>MSSE-10</u><br>Pre: 880<br>Post: 906<br>( <i>P</i> = .225)<br><br><i>Qualitative</i><br>Participants reported<br>experiencing improvements in<br>self-efficacy, self-confidence<br>& physical well-being.                                                                      | Low (20%<br>quality<br>criteria met)         |
| Whiteside and<br>Ruckert, <sup>46</sup> 2020;<br>evaluation | 22 (self-reported<br>diagnosis) including n =<br>12 (AM group) and n =10<br>(PM group)<br><br>21F/1M;<br><br>Age, NR;<br><br>MS type, NR;<br><br>Disability status, multiple<br>walking aids, wheelchairs<br>(n = 2);<br><br>Disease duration, NR | <b>Participatory dance;</b><br><br>Group, in-person;<br><br>75 minutes x 1/week for<br>10 weeks;<br><br>AE, NR;<br><br>Adherence & dropouts,<br>N/A (drop-in format) | <i>Quantitative</i><br>Fatigue (FSS)<br><br>Balance confidence<br>(ABC)<br><br>Gait (MSWS-12)<br><br><i>Qualitative</i><br>Interviews &<br>participant observation | <i>Quantitative</i><br>Pre-post, within group<br><u>ABC</u><br>AM group ( <i>P</i> > .05)<br><br>PM group ( <i>P</i> = .07) <sup>o</sup><br><br><u>FSS</u><br>AM group ( <i>P</i> = .02)*<br>Pre: 5.4<br>Post: 4.7<br><br>PM group ( <i>P</i> = .06) <sup>o</sup><br><br><u>MSWS-12</u><br>AM group ( <i>P</i> = .06) <sup>o</sup> | Moderate<br>(60%<br>quality<br>criteria met) |

|                                       |                                                                                                                                                                                                                                       |                                                                                                                                                  |                                                                  |                                                                                                                                                                              |                                |
|---------------------------------------|---------------------------------------------------------------------------------------------------------------------------------------------------------------------------------------------------------------------------------------|--------------------------------------------------------------------------------------------------------------------------------------------------|------------------------------------------------------------------|------------------------------------------------------------------------------------------------------------------------------------------------------------------------------|--------------------------------|
|                                       |                                                                                                                                                                                                                                       |                                                                                                                                                  |                                                                  | PM group ( $P > .05$ )<br><br><i>Qualitative</i><br>Participants reported experiencing improvements in body confidence & awareness, well-being, belonging & quality of life. |                                |
| <b>Qualitative Study</b>              |                                                                                                                                                                                                                                       |                                                                                                                                                  |                                                                  |                                                                                                                                                                              |                                |
| Baeza and Fuertes, <sup>47</sup> 2022 | 1 (confirmed diagnosis);<br><br>Female;<br><br>Age, 53 years;<br><br>MS type, NR;<br><br>Disability status, carries out daily activities independently using a cane at home and wheelchair outside;<br><br>Disease duration, 18 years | <b>Creative movement practice;</b><br><br>Solo, remote;<br><br>100 minutes x 1/week for 6 weeks;<br><br>AE, NR;<br><br>Adherence & dropouts, N/A | Interviews using visual narratives from photographs as metaphors | Participant reported improvements in body confidence & awareness, emotional confidence & well-being & connectedness with family members.                                     | Low (40% quality criteria met) |

5STS, Five Times Sit-to-Stand; 6MWT, 6-Minute Walk Test; 9HPT, 9-Hole Peg Test; ABC, Activities-Specific Balance Confidence Scale; AE, adverse events; BBS, Berg Balance Scale; BDI, Beck Depression Inventory; CFI, Cognitive Fatigability Index; DGI, Dynamic Gait Index; DT, dual task; DWI, Distance Walked Index; EDSS, Expanded Disability Status Scale; EmNSA, Erasmus modified Nottingham Sensory Assessment; ES, effect size; F, female; FIS, Fatigue Impact Scale; FSS, Fatigue Severity Scale; FSST, Four Square Step Test; GC, gait cycle; GLTEQ, Godin Leisure Time Exercise Questionnaire; HR, heart rate; HR-QoL, health-related quality of life; ICARS, International Cooperative Ataxia Rating Scale; M, male; MAS, Modified Ashworth Scale; MBT, Mini-Balance Evaluation Systems Test; MDRT, Multi-Directional Reach Test; MFIS, Modified Fatigue Impact Scale; MMT, Daniels-Worthingham Manual Muscle Test; MPAM-R, Motives for Physical Activity Measure-Revised; MRD, Minimal Record Disability; MSFC, MS Functional Composite Score; MSIS-29, MS Impact Scale-29; MSSE, Multiple Sclerosis Self-efficacy Scale; MSSS, MS Self-Efficacy Scale; MSWS-12, 12-Item Multiple Sclerosis Walking Scale; N/A, not applicable; NR, not reported; NRS, Scripps Neurologic Rating Scale; PASAT, Paced Auditory Serial Addition Test; PDDS, Patient Determined Disease Steps scale; PPMS, primary progressive MS; PROMIS-GH, Patient-Reported Outcomes Measurement Information System Global Health; RPE, rating of perceived exertion; RRMS, relapsing-remitting MS; T25-FW, Timed 25-Foot Walk Test; TUG, Timed Up and Go; SF-36, Short Form Health Survey; SDMT, Symbol Digit Modalities Test; SPMS, secondary progressive MS.

<sup>a</sup>All people with MS unless otherwise specified.

\* $P \leq .05$

<sup>o</sup>trend towards significance ( $P < .1$ )



**Table S3.** Examples of Qualitative Data

| Themes                                          | Sample Qualitative Data                                                                                                                                                                                                                                                                                                                                                                                                                                                                                                         |
|-------------------------------------------------|---------------------------------------------------------------------------------------------------------------------------------------------------------------------------------------------------------------------------------------------------------------------------------------------------------------------------------------------------------------------------------------------------------------------------------------------------------------------------------------------------------------------------------|
| Theme 1: Body awareness and physical confidence | <p>“When I fell, again in the same place during the week, this time instead of battering and bruising and injuring myself, I kept on my feet because I automatically did that backward, straight leg, and it kept me on my feet. It then let me reach forward and hold onto the sink, so I could get my balance back.”<sup>46</sup></p> <p>“I have noticed that I am more confident in trying things that I thought I couldn't do, or that I knew I would end up exhausted after, like running or stretching.”<sup>45</sup></p> |
| Theme 2: Psychological well-being               | <p>“I enjoy the class. Sometimes I end the class feeling tired but in a better and more energetic mood. In those days where I felt tired even before starting the class, I knew that I would not be forced to do more than I was able to.”<sup>45</sup></p>                                                                                                                                                                                                                                                                     |
| Theme 3: Sense of belonging                     | <p>“You're going somewhere where you don't have to explain as much. Because I don't mind going in and saying 'this is what my symptoms are; this is what I find difficult; this is what I want to get out of it,' but it's more just that when I'm saying that, I don't then have to explain what that actually means on top of having to have that initial explanation.”<sup>46</sup></p> <p>“The class is a totally nonjudgmental atmosphere, so self-conscious inhibition is minimal.”<sup>45</sup></p>                      |
| Theme 4: Social relationships                   | <p>“When you feel the heat and it is heat that comes into your body...you're smiling; you're feeling warmer. And I think when you see each other and we're passing and you're smiling, I love</p>                                                                                                                                                                                                                                                                                                                               |

that part when you're just doing the dancing with each other and that's lovely."<sup>46</sup>

"This image reflects union, and it is what I have felt with my daughter in the last activity of embracing slowly. It is something we never do and should be such a simple and good gesture, we should do it more often."<sup>47</sup> (translated from Spanish to English)

**Table S4.** Mixed Methods Appraisal Tool (MMAT) Quality Assessment

| Studies                                                                    | Qualitative studies |     |     |     |     | Randomized controlled trials |     |     |     |     | Nonrandomized studies |     |     |     |     | Quantitative descriptive studies |     |     |     |     | Mixed-methods studies |     |     |     |     | MMAT score | Overall quality |               |
|----------------------------------------------------------------------------|---------------------|-----|-----|-----|-----|------------------------------|-----|-----|-----|-----|-----------------------|-----|-----|-----|-----|----------------------------------|-----|-----|-----|-----|-----------------------|-----|-----|-----|-----|------------|-----------------|---------------|
| Author, Date, Design                                                       | 1.1                 | 1.2 | 1.3 | 1.4 | 1.5 | 2.1                          | 2.2 | 2.3 | 2.4 | 2.5 | 3.1                   | 3.2 | 3.3 | 3.4 | 3.5 | 4.1                              | 4.2 | 4.3 | 4.4 | 4.5 | 5.1                   | 5.2 | 5.3 | 5.4 | 5.5 |            |                 |               |
| Baeza and Fuertes, <sup>47</sup> 2022                                      | Y                   | Y   | CT  | N   | N   |                              |     |     |     |     |                       |     |     |     |     |                                  |     |     |     |     |                       |     |     |     |     |            | **              | Low           |
| Young et al, <sup>35</sup> 2019; proof-of-concept trial                    |                     |     |     |     |     | Y                            | Y   | N   | Y   | N   |                       |     |     |     |     |                                  |     |     |     |     |                       |     |     |     |     |            | ***             | Moderate      |
| Mandelbaum et al, <sup>38</sup> 2016; uncontrolled, before-and-after study |                     |     |     |     |     |                              |     |     |     |     | Y                     | Y   | CT  | N   | Y   |                                  |     |     |     |     |                       |     |     |     |     |            | ***             | Moderate      |
| Scheidler et al, <sup>39</sup> 2018; uncontrolled, before-and-after study  |                     |     |     |     |     |                              |     |     |     |     | Y                     | Y   | Y   | Y   | CT  |                                  |     |     |     |     |                       |     |     |     |     |            | ****            | Moderate-high |
| Ng et al, <sup>37</sup> 2020; controlled, before-and-after study           |                     |     |     |     |     |                              |     |     |     |     | N                     | Y   | Y   | Y   | Y   |                                  |     |     |     |     |                       |     |     |     |     |            | ****            | Moderate-high |
| Van Geel et al, <sup>36</sup> 2020; controlled, before-and-after study     |                     |     |     |     |     |                              |     |     |     |     | Y                     | Y   | Y   | N   | CT  |                                  |     |     |     |     |                       |     |     |     |     |            | ***             | Moderate      |
| Camacho et al, <sup>40</sup> 2021; uncontrolled, before-and-after study    |                     |     |     |     |     |                              |     |     |     |     | CT                    | Y   | Y   | Y   | CT  |                                  |     |     |     |     |                       |     |     |     |     |            | ***             | Moderate      |
| Salgado and de Paula Vasconcelos, <sup>43</sup> 2010; case report          |                     |     |     |     |     |                              |     |     |     |     |                       |     |     |     |     | CT                               | N   | Y   | Y   | CT  |                       |     |     |     |     |            | **              | Low           |
| Charlton et al, <sup>42</sup> 2010; survey                                 |                     |     |     |     |     |                              |     |     |     |     |                       |     |     |     |     | N                                | N   | N   | Y   | Y   |                       |     |     |     |     |            | **              | Low           |

|                                                                     |    |    |   |   |   |  |  |  |  |  |    |   |   |   |   |    |   |   |   |   |  |   |   |   |    |   |  |  |  |  |  |  |  |  |  |     |          |          |     |
|---------------------------------------------------------------------|----|----|---|---|---|--|--|--|--|--|----|---|---|---|---|----|---|---|---|---|--|---|---|---|----|---|--|--|--|--|--|--|--|--|--|-----|----------|----------|-----|
| Lachance et al, <sup>41</sup> 2021; single-case experimental study  |    |    |   |   |   |  |  |  |  |  |    |   |   |   |   | CT | Y | Y | N | Y |  |   |   |   |    |   |  |  |  |  |  |  |  |  |  | *** | Moderate |          |     |
| Ares-Benítez et al, <sup>44</sup> 2021; case report                 |    |    |   |   |   |  |  |  |  |  |    |   |   |   |   | CT | N | Y | Y | N |  |   |   |   |    |   |  |  |  |  |  |  |  |  |  |     |          | **       | Low |
| Mason, <sup>45</sup> 2020; mixed-methods thesis                     | CT | CT | Y | Y | Y |  |  |  |  |  | CT | Y | Y | Y | Y |    |   |   |   |   |  | Y | N | N | CT | N |  |  |  |  |  |  |  |  |  | *   | Low      |          |     |
| Whiteside and Ruckert, <sup>46</sup> 2020; mixed-methods evaluation | Y  | Y  | Y | Y | Y |  |  |  |  |  | CT | Y | N | Y | Y |    |   |   |   |   |  | N | Y | Y | Y  | N |  |  |  |  |  |  |  |  |  |     | ***      | Moderate |     |

Y (Yes), N (No), CT (Can't tell)
